# Supplementary material
Source: PubMed Central journal article supplement (PMC3442242)

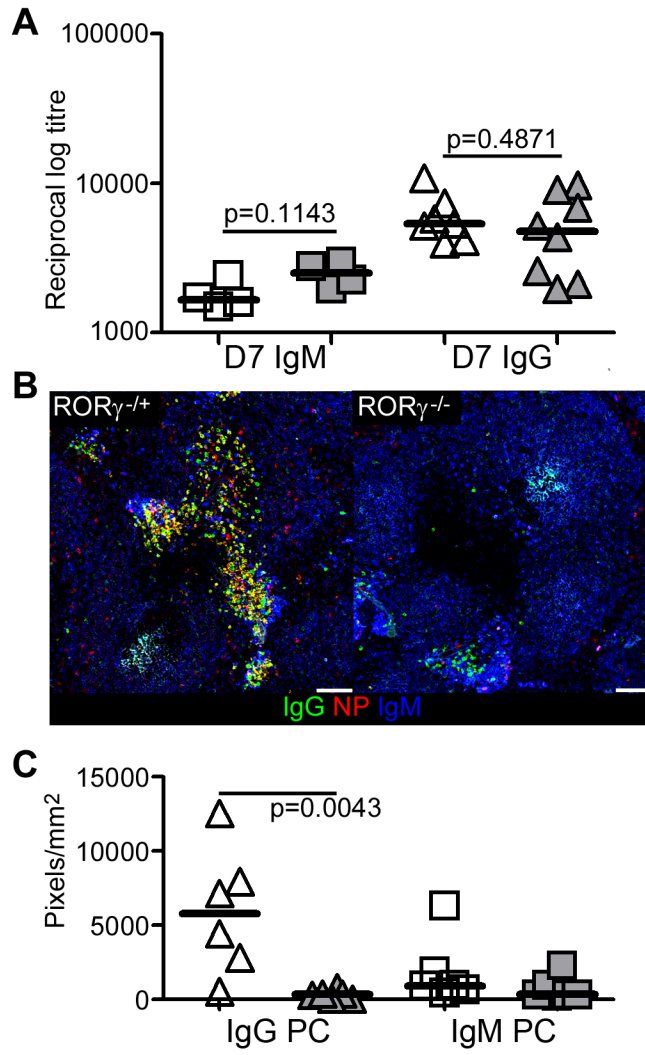

**Supplementary Figure 1**

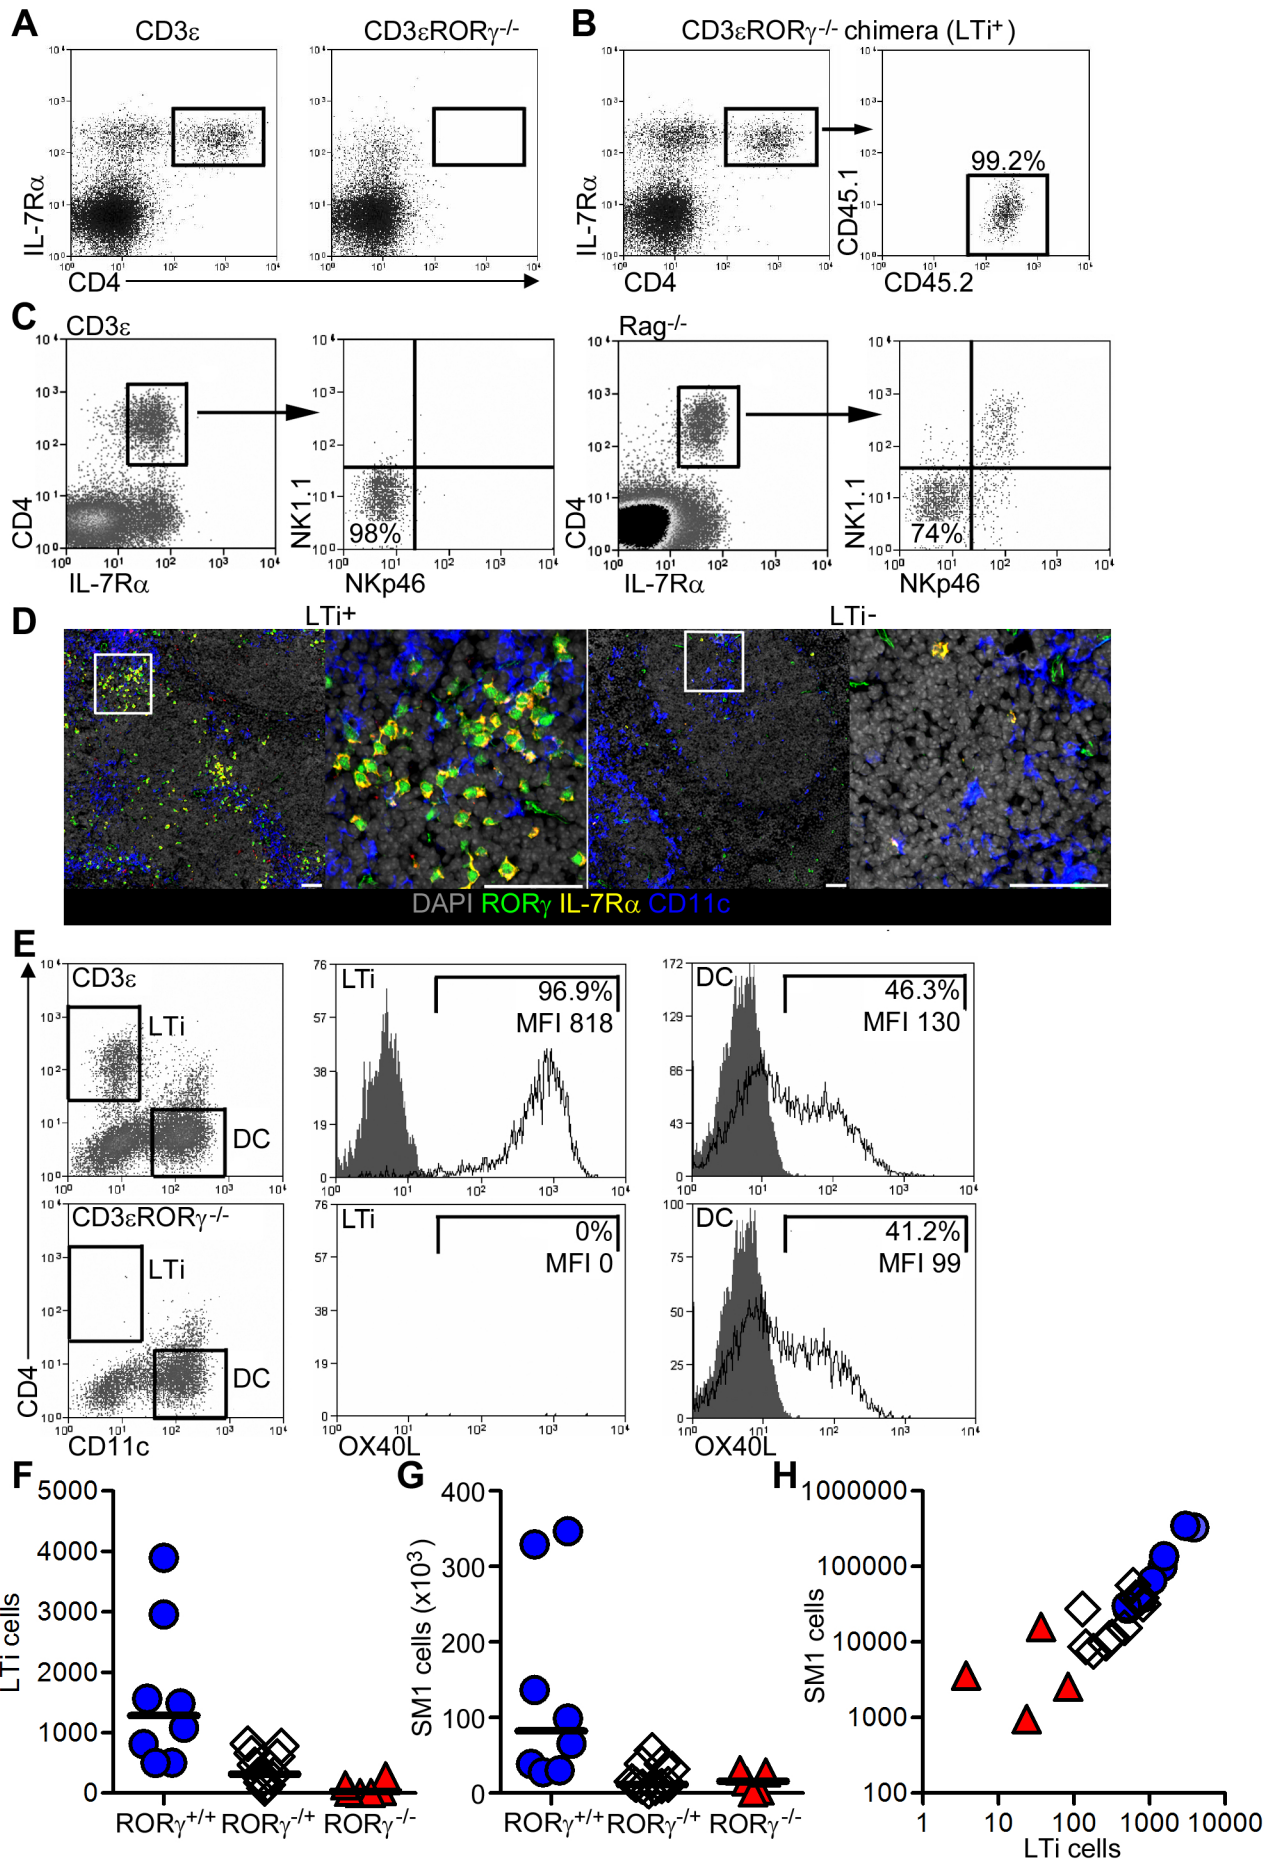

Supplementary Figure 2

Supplement: NIHMS49188-supplement-2.pdf [file NIHMS49188-supplement-2.pdf]
